# Supplementary material for: A Ponceau S Staining-Based Dot Blot Assay for Rapid Protein Quantification of Biological Samples
Source: MDPI journal article supplement (doi:10.3390/gels8010043), 2022-01-07
Supplement: s1 [file s1]

## Supplementary materials

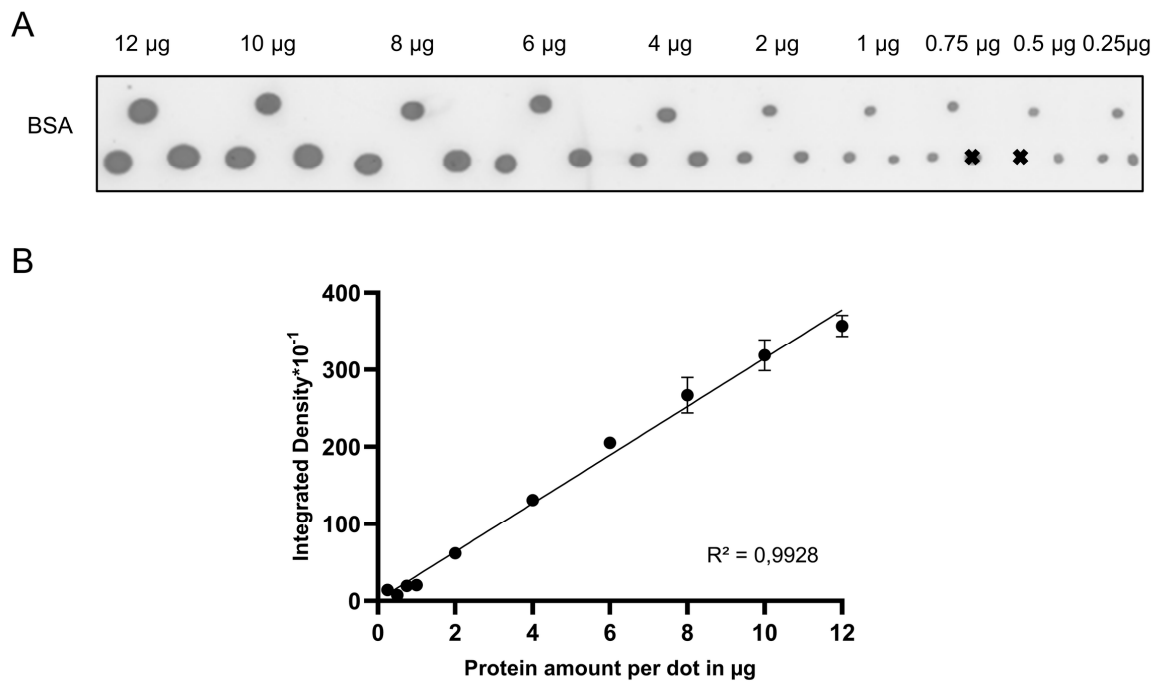

**Figure S1.** Extended range for the PDB assay. **A.** Ponceau S-stained dot blot. BSA standards (fixed concentration) were spotted in triplicates onto a nitrocellulose membrane. **B.** Standard curve based on the integrated density values of the BSA standards in A.

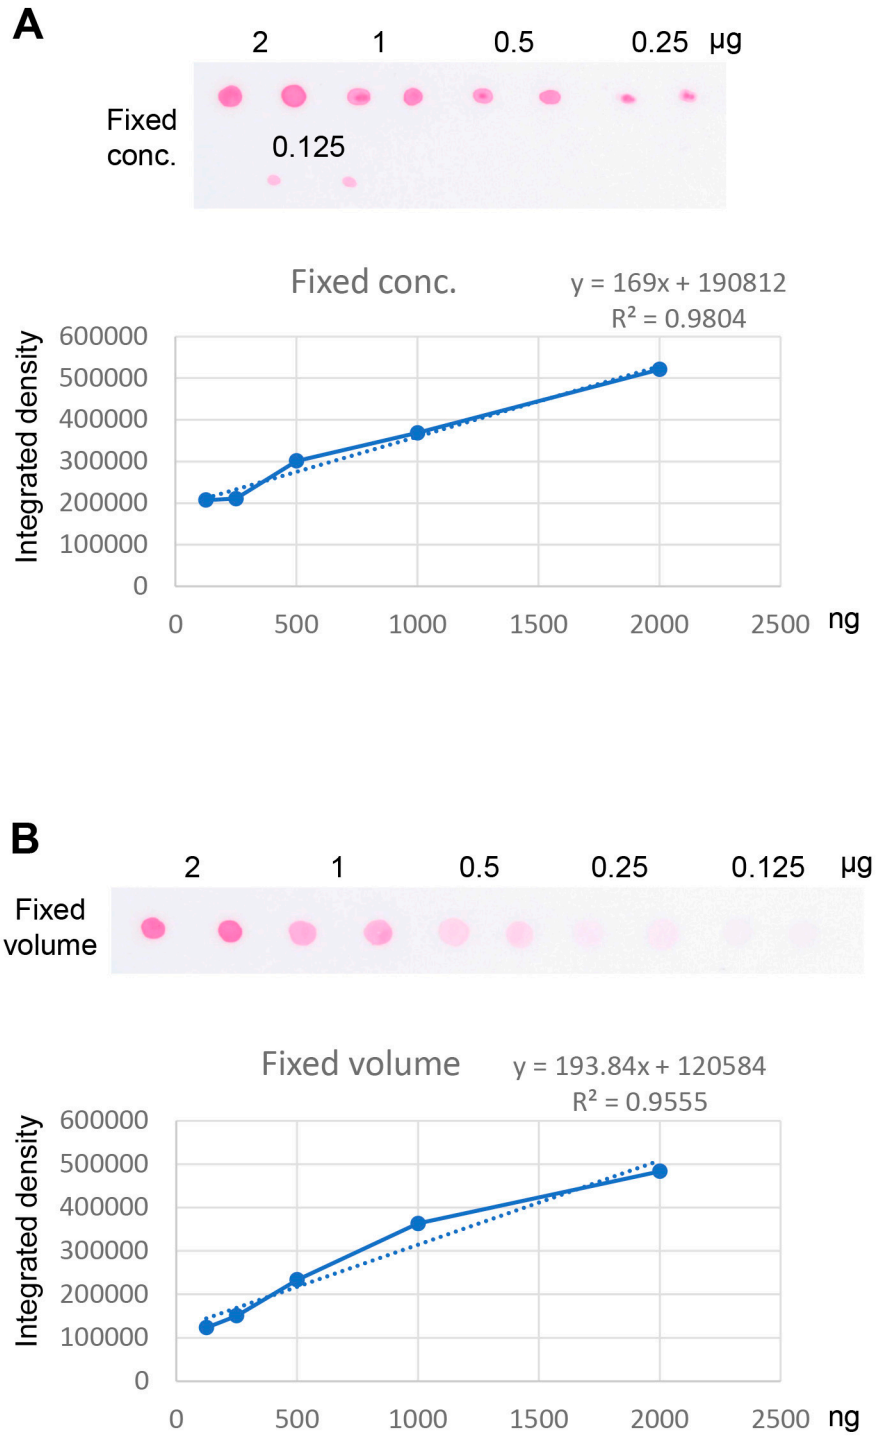

**Figure S2. The integrated density is determined by the protein amount instead of the dot size. A.** Standard curve based on the BSA standards with fixed concentration. **B.** Standard curve based on the BSA standards with fixed volume. The BSA standards were diluted with 0.1% SDS/H<sub>2</sub>O, and spotted in duplicates.

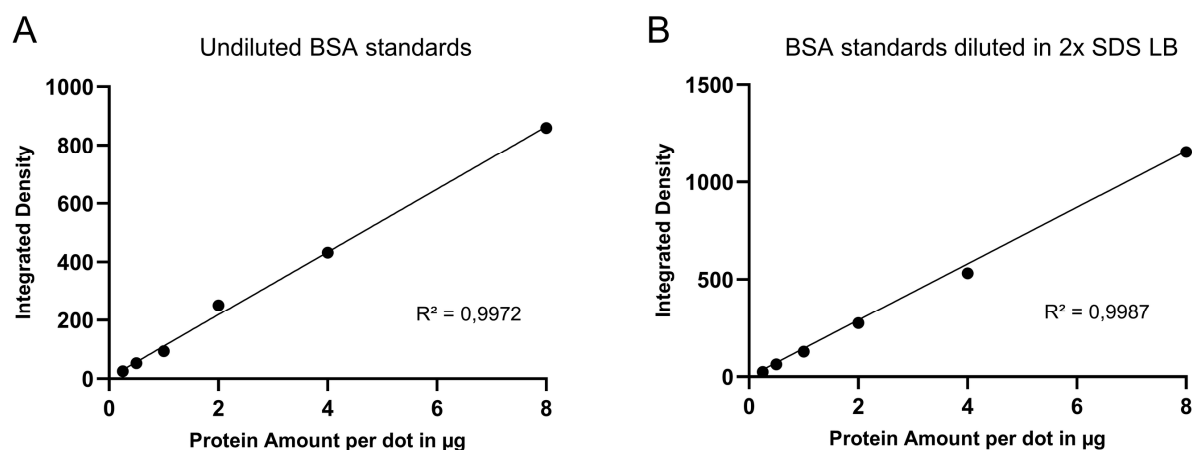

**Figure S3.** Standard curves related to Figure 4 A, B. **A.** Standard curve of a PDB assay performed with undiluted BSA standards (related to Fig 4A). **B.** Standard curve of a PDB assay performed with BSA standards diluted 1:1 in 2x SDS LB (related to Fig 4B). The BSA standards were ranging from 8  $\mu\text{g}$  to 0.5  $\mu\text{g}$  of total protein amount per dot.

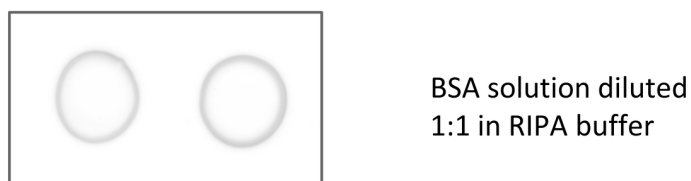

**Figure S4.** BSA standards diluted with RIPA buffer forms “coffee rings” on dot blots.

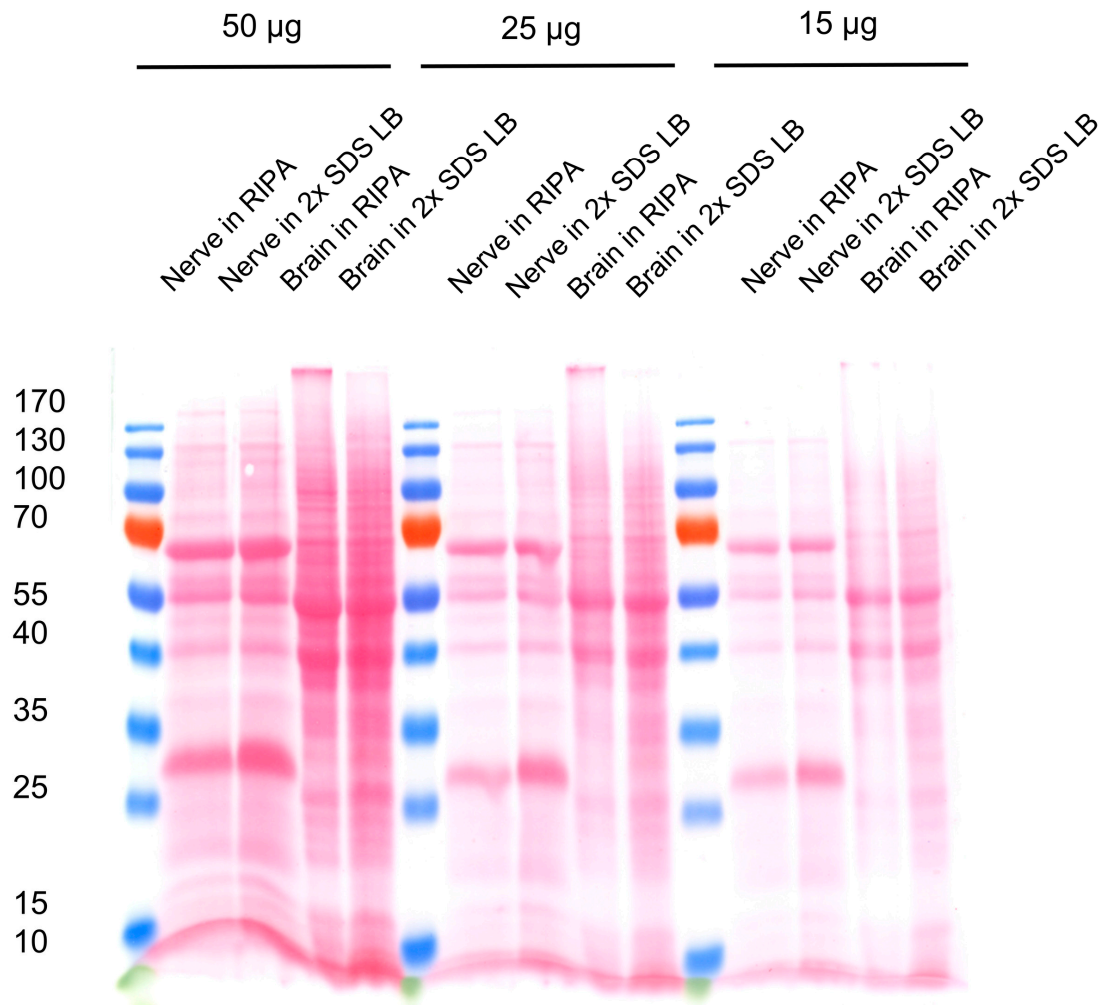

**Figure S5.** Ponceau S staining of the membrane after SDS-PAGE and protein transfer, uncropped, related to Fig. 4C. The loading of the nerve and the brain lysates was based on protein quantification with the PDB assay.

| Method             | Materials                                                                                                                                                | Price (for 12 samples)                                   |
|--------------------|----------------------------------------------------------------------------------------------------------------------------------------------------------|----------------------------------------------------------|
| Ponceau Dot Blot   | <ul style="list-style-type: none"> <li>• Ponceau powder</li> <li>• Nitrocellulose membrane (84cm<sup>2</sup>)</li> <li>• Bovine serum albumin</li> </ul> | 2,05€                                                    |
| Commercial BCA Kit | <ul style="list-style-type: none"> <li>• Kit Materials</li> <li>• Pierce 96-wellplate</li> </ul>                                                         | 13,47€                                                   |
| Selfmade BCA Kit   | <ul style="list-style-type: none"> <li>• Kit Materials</li> <li>• Pierce 96-wellplate</li> </ul>                                                         | Ranging from 15,29€ to 24,91€<br>(depending on producer) |
|                    |                                                                                                                                                          |                                                          |
|                    | Price for 1000 samples<br>Ponceau Dot Blot: 170,83€<br>Commercial BCA Kit: ~1122,50€<br><b><math>\Delta = \sim 951,67\text{€}</math></b>                 |                                                          |

**Figure S6.** Cost comparison between the PDB and the BCA assays.

| Lysis buffer                         | Price per sample in 1 ml lysis buffer                                                                                                                                                                                                           | Cat.Nr./Supplier         |
|--------------------------------------|-------------------------------------------------------------------------------------------------------------------------------------------------------------------------------------------------------------------------------------------------|--------------------------|
| cOmplete Protease Inhibitor Cocktail | 0,28€                                                                                                                                                                                                                                           | 000000011697498001/Roche |
| PhosStop                             | 1,20€                                                                                                                                                                                                                                           | 000000004906845001/Roche |
| RIPA buffer (commercial)             | 0,93€                                                                                                                                                                                                                                           | 89900/Thermo Scientific  |
| RIPA buffer, final solution          | 2,41€                                                                                                                                                                                                                                           |                          |
|                                      |                                                                                                                                                                                                                                                 |                          |
| cOmplete Protease Inhibitor Cocktail | 0,28€                                                                                                                                                                                                                                           | 000000011697498001/Roche |
| PhosStop                             | 1,20€                                                                                                                                                                                                                                           | 000000004906845001/Roche |
| RIPA buffer (selfmade)               | 0,0006€                                                                                                                                                                                                                                         | Various suppliers        |
| RIPA buffer, final solution          | 1,48€                                                                                                                                                                                                                                           |                          |
|                                      |                                                                                                                                                                                                                                                 |                          |
| SDS gel loading buffer (selfmade)    | 0,1€                                                                                                                                                                                                                                            | Various suppliers        |
|                                      |                                                                                                                                                                                                                                                 |                          |
|                                      | <b>Price for 1000 lysates</b><br>RIPA buffer: 2410€<br>RIPA buffer (selfmade): 1480€<br>2x SDS LB: 100€<br><b>Δ=1380 to 2310€</b>                                                                                                               |                          |
|                                      |                                                                                                                                                                                                                                                 |                          |
|                                      | <b>Price for 1000 lysates+quantification</b><br>Commercial BCA kit with lysates in either selfmade or commercial RIPA buffer: ~2602,5 to 3532,5€<br>Ponceau Dot Blot Assay with lysates in 2x SDS LB: 270,83 €<br><b>Δ= 2331,67 to 3261,67€</b> |                          |

**Figure S7.** Cost comparison between the PDB assay with samples lysed in 2x SDS LB and the BCA assay with samples lysed in RIPA buffer.

**Video S1.** Workflow of the PDB assay.
